# Supplementary material
Source: PubMed Central journal article supplement (PMC6801013)

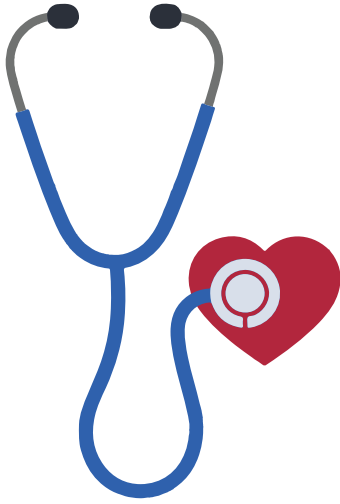

# CARE

## Cancer & Aging Resilience Evaluation

Full name: \_\_\_\_\_

Today's Date: 

|  |  |
|--|--|
|  |  |
|--|--|

 / 

|  |  |
|--|--|
|  |  |
|--|--|

 / 

|  |  |  |  |
|--|--|--|--|
|  |  |  |  |
|--|--|--|--|

**Instructions:** Please answer the questionnaire to the best of your ability. Please mark boxes with an "x" or a check. If you make a mistake, please mark out the incorrect answer and mark an "x" in the correct box and circle it.

Example:  Yes    No

Yes    No

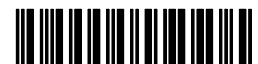

1. How many times have you fallen in the last 6 months? 

|  |  |
|--|--|
|  |  |
|--|--|
  
2. Does your health limit you in walking one block?     Not limited at all     Limited a little     Limited a lot
  
3. Can you get to places out of walking distance...  
 Without help (drive your own car, or travel alone on buses or taxis);  
 With some help (need someone to help you or go with you when traveling); or  
 Are you unable to travel unless emergency arrangements are made for specialized vehicle like an ambulance?
  
4. Can you go shopping for groceries or clothes (assuming you have transportation)...  
 Without help (taking care of all shopping needs yourself, assuming you had transportation);  
 With some help (need someone to go with you on shopping trips); or  
 Are you completely unable to do any shopping?
  
5. Can you prepare your own meals...  
 Without help (plan and cook all meals yourself);  
 With some help (can prepare some things but unable to cook full meals yourself); or  
 Are you completely unable to prepare any meals?
  
6. Can you do your housework...  
 Without help (can clean floors, etc.);  
 With some help (can do light housework but need help with heavy work); or  
 Are you completely unable to do any housework?
  
7. Can you take your own medicines...  
 Without help (in the right doses at the right time);  
 With some help (able to take medicine if someone prepares it for you and/or reminds you); or  
 Are you completely unable to take your medicines?
  
8. Can you handle your own money...  
 Without help (write checks, pay bills, etc.);  
 With some help (manage day-to-day buying but need help with managing your checkbook and paying your bills); or  
 Are you completely unable to handle money?
  
9. Can you get in and out of bed...  
 Without any help or aids;  
 With some help (either from a person or with the aid of some device); or  
 Are you totally dependent on someone else to lift you?

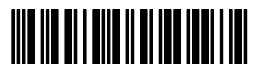

10. Can you dress and undress yourself...

- Without help (able to pick out clothes, dress and undress yourself);
- With some help; or
- Are you completely unable to dress and undress yourself?

11. Can you take a bath or shower...

- Without help;
- With some help (need help getting in and out of the tub or need special attachments); or
- Are you completely unable to bathe yourself?

|                                                                                                                                                                                                                                   | Excellent                | Very good                | Good                     | Fair                     | Poor                     |                          |                          |                          |                          |                          |    |
|-----------------------------------------------------------------------------------------------------------------------------------------------------------------------------------------------------------------------------------|--------------------------|--------------------------|--------------------------|--------------------------|--------------------------|--------------------------|--------------------------|--------------------------|--------------------------|--------------------------|----|
| In general, would you say your health is:                                                                                                                                                                                         | <input type="checkbox"/> |                          |                          |                          |                          |                          |    |
| In general, would you say your quality of life is:                                                                                                                                                                                | <input type="checkbox"/> |                          |                          |                          |                          |                          |    |
| In general, how would you rate your physical health?                                                                                                                                                                              | <input type="checkbox"/> |                          |                          |                          |                          |                          |    |
| In general, how would you rate your mental health, including your mood and your ability to think?                                                                                                                                 | <input type="checkbox"/> |                          |                          |                          |                          |                          |    |
| In general, how would you rate your satisfaction with your social activities and relationships?                                                                                                                                   | <input type="checkbox"/> |                          |                          |                          |                          |                          |    |
| In general, please rate how well you carry out your usual social activities and roles. (This includes activities at home, at work and in your community, and responsibilities as a parent, child, spouse, employee, friend, etc.) | <input type="checkbox"/> |                          |                          |                          |                          |                          |    |
| To what extent are you able to carry out your everyday physical activities such as walking, climbing stairs, carrying groceries, or moving a chair?                                                                               | <b>Completely</b>        | <b>Mostly</b>            | <b>Moderately</b>        | <b>A little</b>          | <b>Not at All</b>        |                          |                          |                          |                          |                          |    |
|                                                                                                                                                                                                                                   | <input type="checkbox"/> |                          |                          |                          |                          |                          |    |
| <b>In the past 7 days</b> , how often have you been bothered by emotional problems such as feeling anxious, depressed or irritable?                                                                                               | <b>Never</b>             | <b>Rarely</b>            | <b>Sometimes</b>         | <b>Often</b>             | <b>Always</b>            |                          |                          |                          |                          |                          |    |
|                                                                                                                                                                                                                                   | <input type="checkbox"/> |                          |                          |                          |                          |                          |    |
| <b>In the past 7 days</b> , how would you rate your fatigue on average?                                                                                                                                                           | <b>None</b>              | <b>Mild</b>              | <b>Moderate</b>          | <b>Severe</b>            | <b>Very Severe</b>       |                          |                          |                          |                          |                          |    |
|                                                                                                                                                                                                                                   | <input type="checkbox"/> |                          |                          |                          |                          |                          |    |
| <b>In the past 7 days</b> , how would you rate your pain on average?                                                                                                                                                              | No Pain                  |                          |                          |                          |                          |                          |                          |                          |                          | Worst Pain Imaginable    |    |
|                                                                                                                                                                                                                                   | <input type="checkbox"/> |    |
|                                                                                                                                                                                                                                   | 0                        | 1                        | 2                        | 3                        | 4                        | 5                        | 6                        | 7                        | 8                        | 9                        | 10 |

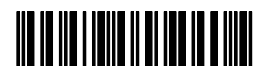

Nutrition:

**1. Weight**

I currently weigh \_\_\_\_\_ pounds, and I am \_\_\_\_\_ feet and \_\_\_\_\_ inches tall

One month ago I weighed about \_\_\_\_\_ pounds

Six months ago I weighed about \_\_\_\_\_ pounds

During the past two weeks my weight has:

- Decreased     Not changed     Increased

**2. Food intake**

As compared to my normal intake, I would rate my food intake during the past month as:

- Unchanged  
 More than usual  
 Less than usual

I am now taking:

- Normal food but less than normal  
 Little solid food  
 Only liquids  
 Only nutritional supplements  
 Very little of anything  
 Only tube feedings or only nutrition by vein

**3. Symptoms** I have had the following problems that have kept me from eating enough during the past two weeks (Check ALL that apply):

- |                                                                     |                                                              |                                            |
|---------------------------------------------------------------------|--------------------------------------------------------------|--------------------------------------------|
| <input type="checkbox"/> No eating problems                         | <input type="checkbox"/> Things taste funny or have no taste | <input type="checkbox"/> Smells bother me  |
| <input type="checkbox"/> No appetite, just did not feel like eating | <input type="checkbox"/> Problems swallowing                 | <input type="checkbox"/> Feel full quickly |
| <input type="checkbox"/> Nausea                                     | <input type="checkbox"/> Vomiting                            | <input type="checkbox"/> Fatigue           |
| <input type="checkbox"/> Constipation                               | <input type="checkbox"/> Diarrhea                            | <input type="checkbox"/> Mouth sores       |
| <input type="checkbox"/> Pain; where? _____                         |                                                              | <input type="checkbox"/> Dry mouth         |
| <input type="checkbox"/> Other _____                                | (examples: depression, money, or dental problems)            |                                            |

**4. Activities and Function**

Over the past month, I would generally rate my activity as:

- Normal activity with no limitations  
 Not your normal self, but able to be up and about with fairly normal activities  
 Not feeling up to most things, but in bed or chair less than half the day  
 Able to do little activity and spend most of the day in bed or chair  
 Pretty much bedridden, rarely out of bed

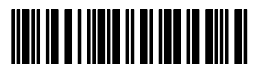

| <b>KINDS OF SUPPORT</b><br>Do you have...                                    | <b>None of the time</b>  | <b>A little of the time</b> | <b>Some of the time</b>  | <b>Most of the time</b>  | <b>All of the time</b>   |
|------------------------------------------------------------------------------|--------------------------|-----------------------------|--------------------------|--------------------------|--------------------------|
| Someone to help if you were confined to bed                                  | <input type="checkbox"/> | <input type="checkbox"/>    | <input type="checkbox"/> | <input type="checkbox"/> | <input type="checkbox"/> |
| Someone to take you to the doctor if needed                                  | <input type="checkbox"/> | <input type="checkbox"/>    | <input type="checkbox"/> | <input type="checkbox"/> | <input type="checkbox"/> |
| Someone to prepare your meals if you are unable to do it yourself            | <input type="checkbox"/> | <input type="checkbox"/>    | <input type="checkbox"/> | <input type="checkbox"/> | <input type="checkbox"/> |
| Someone to help with daily chores if you were sick                           | <input type="checkbox"/> | <input type="checkbox"/>    | <input type="checkbox"/> | <input type="checkbox"/> | <input type="checkbox"/> |
| Someone to have a good time with                                             | <input type="checkbox"/> | <input type="checkbox"/>    | <input type="checkbox"/> | <input type="checkbox"/> | <input type="checkbox"/> |
| Someone to turn to for suggestions about how to deal with a personal problem | <input type="checkbox"/> | <input type="checkbox"/>    | <input type="checkbox"/> | <input type="checkbox"/> | <input type="checkbox"/> |
| Someone who understands your problems                                        | <input type="checkbox"/> | <input type="checkbox"/>    | <input type="checkbox"/> | <input type="checkbox"/> | <input type="checkbox"/> |
| Someone to love and make you feel wanted                                     | <input type="checkbox"/> | <input type="checkbox"/>    | <input type="checkbox"/> | <input type="checkbox"/> | <input type="checkbox"/> |

| <b>In the past 7 days...</b>                               | <b>Never</b>             | <b>Rarely</b>            | <b>Sometimes</b>         | <b>Often</b>             | <b>Always</b>            |
|------------------------------------------------------------|--------------------------|--------------------------|--------------------------|--------------------------|--------------------------|
| I felt fearful                                             | <input type="checkbox"/> |
| I found it hard to focus on anything other than my anxiety | <input type="checkbox"/> |
| My worries overwhelmed me                                  | <input type="checkbox"/> |
| I felt uneasy                                              | <input type="checkbox"/> |
| I felt worthless                                           | <input type="checkbox"/> |
| I felt helpless                                            | <input type="checkbox"/> |
| I felt depressed                                           | <input type="checkbox"/> |
| I felt hopeless                                            | <input type="checkbox"/> |

| <b>In the past 7 days...</b>                                                                  | <b>Never</b>             | <b>Rarely</b>            | <b>Sometimes</b>         | <b>Often</b>             | <b>Very often</b>        |
|-----------------------------------------------------------------------------------------------|--------------------------|--------------------------|--------------------------|--------------------------|--------------------------|
| My thinking has been slow                                                                     | <input type="checkbox"/> |
| It has seemed like my brain was not working as usual                                          | <input type="checkbox"/> |
| I have had to work harder than usual to keep track of what I was doing                        | <input type="checkbox"/> |
| I have had trouble shifting back and forth between different activities that require thinking | <input type="checkbox"/> |

1. How many medications do you take on a daily basis? 

|  |  |
|--|--|
|  |  |
|--|--|

2. How many medical problems do you have other than your cancer? 

|  |  |
|--|--|
|  |  |
|--|--|

3. Have you been seen in the ER (Emergency Room) in the past year?  
 Yes  No  Don't know/ Not sure

4. Have you been hospitalized (spent at least one night in the hospital) in the past year?  
 Yes  No  Don't know/ Not sure

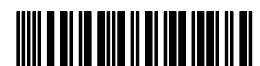

1. During the past 4 weeks, how much of the time has your physical health or emotional problems interfered with your social activities (like visiting friends, relatives, etc.)?

- All of the time     
  Most of the time     
  Some of the time     
  A little of the time     
  None of the time

2. Compared to others your age, are your social activities more or less limited because of your physical or emotional problems?

- Much more limited than others     
  Somewhat more limited than others     
  About the same as others     
  Somewhat less limited than others     
  Much less limited than others

3. How is your eyesight (with glasses or contacts)?

- Excellent     
  Good     
  Fair     
  Poor     
  Totally Blind

4. How is your hearing (with a hearing aid, if needed)?

- Excellent     
  Good     
  Fair     
  Poor     
  Totally Deaf

5. Do you have to pay for more medical care than you can afford?

- Strongly Agree     
  Agree     
  Uncertain     
  Disagree     
  Strongly Disagree

**Your Health:** Do you have any of the following illnesses **at the present time**? If you fill in "yes," please tell us how much the illness interferes with your activities:

**IF YOU HAVE THE ILLNESS,  
how much does it interfere with your activities?**

| <u>Illness</u>                      | No                       | Yes                      | <i>If Yes...</i> | Not at all               | Somewhat                 | A Great Deal             |
|-------------------------------------|--------------------------|--------------------------|------------------|--------------------------|--------------------------|--------------------------|
| Other cancers or leukemia           | <input type="checkbox"/> | <input type="checkbox"/> | —————▶           | <input type="checkbox"/> | <input type="checkbox"/> | <input type="checkbox"/> |
| Arthritis or rheumatism             | <input type="checkbox"/> | <input type="checkbox"/> | —————▶           | <input type="checkbox"/> | <input type="checkbox"/> | <input type="checkbox"/> |
| Glaucoma                            | <input type="checkbox"/> | <input type="checkbox"/> | —————▶           | <input type="checkbox"/> | <input type="checkbox"/> | <input type="checkbox"/> |
| Emphysema or chronic bronchitis     | <input type="checkbox"/> | <input type="checkbox"/> | —————▶           | <input type="checkbox"/> | <input type="checkbox"/> | <input type="checkbox"/> |
| High blood pressure                 | <input type="checkbox"/> | <input type="checkbox"/> | —————▶           | <input type="checkbox"/> | <input type="checkbox"/> | <input type="checkbox"/> |
| Heart disease                       | <input type="checkbox"/> | <input type="checkbox"/> | —————▶           | <input type="checkbox"/> | <input type="checkbox"/> | <input type="checkbox"/> |
| Circulation trouble in arms or legs | <input type="checkbox"/> | <input type="checkbox"/> | —————▶           | <input type="checkbox"/> | <input type="checkbox"/> | <input type="checkbox"/> |
| Diabetes                            | <input type="checkbox"/> | <input type="checkbox"/> | —————▶           | <input type="checkbox"/> | <input type="checkbox"/> | <input type="checkbox"/> |
| Stomach or intestinal disorders     | <input type="checkbox"/> | <input type="checkbox"/> | —————▶           | <input type="checkbox"/> | <input type="checkbox"/> | <input type="checkbox"/> |
| Osteoporosis                        | <input type="checkbox"/> | <input type="checkbox"/> | —————▶           | <input type="checkbox"/> | <input type="checkbox"/> | <input type="checkbox"/> |
| Chronic liver or kidney disease     | <input type="checkbox"/> | <input type="checkbox"/> | —————▶           | <input type="checkbox"/> | <input type="checkbox"/> | <input type="checkbox"/> |
| Stroke                              | <input type="checkbox"/> | <input type="checkbox"/> | —————▶           | <input type="checkbox"/> | <input type="checkbox"/> | <input type="checkbox"/> |
| Depression                          | <input type="checkbox"/> | <input type="checkbox"/> | —————▶           | <input type="checkbox"/> | <input type="checkbox"/> | <input type="checkbox"/> |

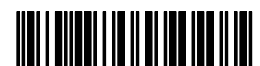

**Demographics**

1. What is the highest grade you finished in school?
 

|                                               |                                                     |
|-----------------------------------------------|-----------------------------------------------------|
| <input type="checkbox"/> 1-8 grades           | <input type="checkbox"/> Junior college degree      |
| <input type="checkbox"/> 9-11 grades          | <input type="checkbox"/> College degree (B.A./B.S.) |
| <input type="checkbox"/> High school graduate | <input type="checkbox"/> Some post-college work     |
| <input type="checkbox"/> Some college         | <input type="checkbox"/> Advanced degree            |
  
2. What is your current marital status?
 

|                                                |                                   |
|------------------------------------------------|-----------------------------------|
| <input type="checkbox"/> Single, never married | <input type="checkbox"/> Divorced |
| <input type="checkbox"/> Married               | <input type="checkbox"/> Widowed  |
| <input type="checkbox"/> Separated             |                                   |
  
3. What is your race? (Check ALL that apply)
 

|                                                                                     |                                          |
|-------------------------------------------------------------------------------------|------------------------------------------|
| <input type="checkbox"/> White                                                      | <input type="checkbox"/> Asian           |
| <input type="checkbox"/> Black or African American                                  | <input type="checkbox"/> Native Hawaiian |
| <input type="checkbox"/> Native American or Alaskan Native                          |                                          |
| <input type="checkbox"/> Other, specify: <input style="width: 200px;" type="text"/> |                                          |

4. What is your ethnicity?
 

|                                             |                                       |
|---------------------------------------------|---------------------------------------|
| <input type="checkbox"/> Hispanic or Latino | <input type="checkbox"/> Non-Hispanic |
|---------------------------------------------|---------------------------------------|
  
5. What is your current employment status? (Check ALL that apply)
 

|                                                                                     |                                     |
|-------------------------------------------------------------------------------------|-------------------------------------|
| <input type="checkbox"/> Employed more than 32 hours per week                       | <input type="checkbox"/> Disabled   |
| <input type="checkbox"/> Employed less than 32 hours per week                       | <input type="checkbox"/> Unemployed |
| <input type="checkbox"/> Full-time or Part-time student                             | <input type="checkbox"/> Retired    |
| <input type="checkbox"/> On medical leave                                           | <input type="checkbox"/> Homemaker  |
| <input type="checkbox"/> Other, specify: <input style="width: 200px;" type="text"/> |                                     |
  
6. With whom do you live? (Check ALL that apply)
 

|                                                                                     |
|-------------------------------------------------------------------------------------|
| <input type="checkbox"/> Spouse/Partner                                             |
| <input type="checkbox"/> Parent(s)/Parent(s)-In-Law                                 |
| <input type="checkbox"/> Live alone                                                 |
| <input type="checkbox"/> Children aged 18 years or younger                          |
| <input type="checkbox"/> Children aged 19 years or older                            |
| <input type="checkbox"/> Other, specify: <input style="width: 200px;" type="text"/> |

**Your Feedback:**

1. About how long did it take you to complete the questionnaire?  

|  |  |  |
|--|--|--|
|  |  |  |
|--|--|--|

 minutes
  
2. Were any of these questions difficult to understand?
 

|                                                          |
|----------------------------------------------------------|
| <input type="checkbox"/> No                              |
| <input type="checkbox"/> Yes, which questions were they? |
| <input style="width: 700px; height: 30px;" type="text"/> |
  
3. Was the time it took to answer all the questions too long, just right, or too short?
 

|                                     |
|-------------------------------------|
| <input type="checkbox"/> Too short  |
| <input type="checkbox"/> Just right |
| <input type="checkbox"/> Too long   |
  
4. Did you require assistance with the questionnaire?
 

|                                                                                          |
|------------------------------------------------------------------------------------------|
| <input type="checkbox"/> No                                                              |
| <input type="checkbox"/> Yes → If yes, who helped you complete this questionnaire? _____ |

**THANK YOU for taking the time to complete the questionnaire!**

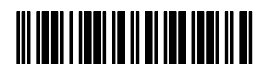

Supplement: NIHMS1527325-supplement-1.pdf [file NIHMS1527325-supplement-1.pdf]
